# Supplementary material for: Selective Cardiomyocyte Oxidative Stress Leads to Bystander Senescence of Cardiac Stromal Cells
Source: PubMed Central journal article supplement (PMC7956294; doi:10.3390/ijms22052245), 2021-02-24
Supplement: ijms-22-02245-s001.pdf [file ijms-22-02245-s001.pdf]

## Supplementary Tables

### Supplementary Table S1: Echocardiographic Measurements of NTg and Tg MAOA mice at 9 and 13 weeks.

Data are expressed as means  $\pm$  SEM. \*p < 0.05, \*\*p < 0.01 vs NTg

| Age               | 9 weeks           |                   | 13 weeks          |                     |
|-------------------|-------------------|-------------------|-------------------|---------------------|
| Genotype          | NTg               | Tg MAOA           | NTg               | Tg MAOA             |
| Number of animals | 5                 | 8                 | 5                 | 7                   |
| FS (%)            | 33,76 $\pm$ 1,61  | 31,66 $\pm$ 1,76  | 34,08 $\pm$ 1,22  | 26,75 $\pm$ 1,61 ** |
| LVEF (%)          | 63,15 $\pm$ 2,25  | 60,07 $\pm$ 2,67  | 63,92 $\pm$ 1,8   | 52,56 $\pm$ 2,65 ** |
| LV mass (mg)      | 130,3 $\pm$ 5,93  | 129,6 $\pm$ 6,87  | 113,5 $\pm$ 5,34  | 138,6 $\pm$ 6,81 *  |
| LIVDd (mm)        | 3,998 $\pm$ 0,16  | 3,856 $\pm$ 0,18  | 3,564 $\pm$ 0,15  | 3,996 $\pm$ 0,11 *  |
| LIVDs (mm)        | 2,650 $\pm$ 0,12  | 2,694 $\pm$ 0,15  | 2,344 $\pm$ 0,21  | 2,848 $\pm$ 0,14    |
| Heart rate (bpm)  | 559,5 $\pm$ 15,10 | 538,4 $\pm$ 10,97 | 563,1 $\pm$ 11,59 | 537,5 $\pm$ 8,686   |

FS, Fractional shortening; LVEF, left ventricular ejection fraction ; LV mass, left ventricular mass ; LIVDd, diastolic left ventricular dimension; LIVDs, systolic left ventricular dimension

## Supplementary Table S2: Antibody list

| Primary antibodies (Immunofluorescence) |                   |         |
|-----------------------------------------|-------------------|---------|
| Target                                  | Supplier          | ref     |
| Immunofluorescence microscopy           |                   |         |
| Ki67 (Clone SP6)                        | Cell Marque       | 275R-14 |
| γH2A.X (Clone JBW301)                   | Merck-Millipore   | 05-636  |
| Goat anti mouse AF488                   | Life Technologies | A-11029 |
| Goat anti rabbit AF594                  | Life Technologies | A-11037 |
| Other                                   |                   |         |
| DAPI                                    | Sigma             | D9542   |

| Flow cytometry antibodies |             |                  |        |                      |             |                   |               |
|---------------------------|-------------|------------------|--------|----------------------|-------------|-------------------|---------------|
| Cell sorting Panel        |             |                  |        | cardiac macrophages  |             |                   |               |
| Target                    | Clone       | Supplier         | Ref    |                      |             |                   |               |
| CD45 APC-Cy7              | 30-F11      | Biolegend        | 103116 | CD45 APC-Cy7         | 30-F11      | Biolegend         | 103116        |
| CD31 PerCP-Cy5.5          | 390         | Biolegend        | 102420 | CD64 PE-Cy7          | X54-5/7.1   | Biolegend         | 139313        |
| Sca-1 BV711               | D7          | Biolegend        | 108131 | CCR2 PE              | 475301      | R&D Systems       | FAB5538P      |
| CD140a APC                | APA5        | Biolegend        | 135908 | Ly6C eFluor450       | HK1.4       | eBioscience       | 48-5932       |
| CD64 PE                   | X54-5/7.1   | Biolegend        | 139303 | MHCII FITC           | M5/114.15.2 | Biolegend         | 107606        |
| MHCII FITC                | M5/114.15.2 | Biolegend        | 107606 | CD14 PerCP-eFluor710 | Sa2-8       | eBioscience       | 46-0141-82    |
|                           |             |                  |        | CD11c AF647          | N418        | Biolegend         | 117314        |
| Aqua Dye                  |             | Life technologie | L34966 | CD86 PerCP-Cy5.5     | GL-1        | Biolegend         | 105027        |
|                           |             |                  |        | CD206 AF647          | MR5D3       | Bio-rad           | MCA2235A6 47T |
|                           |             |                  |        | CD163 PE             | TNKUPJ      | eBioscience       | 12-1631-80    |
|                           |             |                  |        | CD11b PB             | M1/70       | Biolegend         | 101224        |
|                           |             |                  |        |                      |             |                   |               |
|                           |             |                  |        | Yellow Dye           |             | Life Technologies | L34959        |

  

| Cardiac mesenchymal stromal cells |        |                   |        |
|-----------------------------------|--------|-------------------|--------|
| Target                            | Clone  | Supplier          | Ref    |
| CD45 APC-Cy7                      | 30-F11 | Biolegend         | 103116 |
| CD31 PerCP-Cy5.5                  | 390    | Biolegend         | 102420 |
| Sca-1 FITC                        | D7     | Biolegend         | 108131 |
| CD140a APC                        | APA5   | Biolegend         | 135908 |
| CD90.2 BV421                      | 53-2.1 | Biolegend         | 140327 |
|                                   |        |                   |        |
| Yellow Dye                        |        | Life Technologies | L34959 |

**Supplementary Table S3: Mouse primer list**

| Primers       |                                                           |              |                                                          |
|---------------|-----------------------------------------------------------|--------------|----------------------------------------------------------|
| <i>Arg1</i>   | S AGAGCTGACAGCAACCCTGT<br>AS GGATCCAGAAGGTGATGGAA         | <i>Igf1</i>  | S GCTCTCAGTTCGTGTGTGGAC<br>AS AGCCTGTGGGCTTGTGAAGTA      |
| <i>Ccl2</i>   | S AAACCTGGATCGGAACCAAAT<br>AS TACGGGTCAACTTCACATTCAAA     | <i>Il10</i>  | S TTCAGCCAGGTGAAGACTTTCT<br>AS GCTTGGCAACCCAAGTAACC      |
| <i>Ccl8</i>   | S CACCTGAGTTAAGAGACAGCCAAAG<br>AS TGAGAAAACACGCAGCCCA     | <i>Il1a</i>  | S TTGGTTAAATGACCTGCAACA<br>AS GAGCGCTCACGAACAGTTG        |
| <i>Ccr2</i>   | S CCTTGGGAATGAGTAAGTGTGTA<br>AS AATGACAGGATTAATGCAGCAGTGT | <i>Il1b</i>  | S GATCCACACTCTCCAGCTGCA<br>AS CAACCAACAAGTGATATTCTCCATG  |
| <i>Cd163</i>  | S CATCATGGCACAGGTCACCC<br>AS CGCTGAATCTGTCTCGCTT          | <i>Il1rn</i> | S ACATGGCAAACAACACAGGA<br>AS TAGCAAATGAGCCACAGACG        |
| <i>Cdkn1a</i> | S GCAGAATAAAAGGTGCCACAGGC<br>AS CCGAAGAGACAACGGCACACT     | <i>Il33</i>  | S ATGGGAAGAAGCTGATGGTG<br>AS CCGAGGACTTTTTGTGAAGG        |
| <i>Cdkn1c</i> | S CTACGCGCTATCACTGGGAAG<br>AS ATCACCAATCAGCCAGCCTT        | <i>Il6</i>   | S GAGGATACCACTCCCAACAGACC<br>AS AAGTGCATCATCGTTGTTCATACA |
| <i>Cdkn2a</i> | S CCGAACTCTTTCGGTCGTACCC<br>AS CTGCTACGTGAACGTTGCCCA      | <i>Il7</i>   | S ACCATGTTCCATGTTTCTTTTAGAT<br>AS TGTGACAGGCAGCAGAACAA   |
| <i>Cdkn2b</i> | S AGATCCCAACGCCCTGAAC<br>AS CAGTTGGGTTCTGCTCCGT           | <i>Mrc1</i>  | S ATGCCAAGTGGGAAAATCTG<br>AS TGTAGCAGTGGCCTGCATAG        |
| <i>Cdkn2c</i> | S GGGGGACCTAGAGCAACTTAC<br>AS CTCCGGATTCCAAGTTTCA         | <i>Mertk</i> | S AAGGTCCCCGTCTGTCTCTAA<br>AS GCGGGGAGGGGATTACTTTG       |
| <i>Cdkn2d</i> | S CCTGAACCGCTTTGGCAAGAC<br>AS ATCTTGGACATTGGGGCTGGC       | <i>Postn</i> | S GGACACCTCGTGGCAGTTTC<br>AS CCGCCATCACCTCTGACCT         |
| <i>Chi3l3</i> | S AATGATTCTGCTCCTGTGG<br>AS ACTTTGATGGCCTCAACCTG          | <i>Thbs4</i> | S TTCAGATGTGACGCCTGTCC<br>AS CAACATCAGTGCACACCTGC        |
| <i>Cx3cl1</i> | S TGGCTTTGCTCATCCGCTATCAG<br>AS CGTCTGTGCTGTGCTCTCC       | <i>Tnfa</i>  | S CCACCACGCTTTCTGTCTAC<br>AS AGGGTCTGGGCCATAGAACT        |
| <i>Cx3cr1</i> | S GCCTGTTATTTGGGCGACATT<br>AS GCGAGGACCACCAACAGATTT       |              |                                                          |
| <i>Cxcl12</i> | S CTCAACACTCCAACTGTGCC<br>AS TTGGGCTGTTGTGCTTACTTG        | <i>Rplp0</i> | S GCTTCATTGTGGGAGCAGAC<br>AS ATGGTGTCTTGCCCATCAG         |
| <i>Gdf6</i>   | S GGGCATCAATGCCAGCTTTT<br>AS GTGCGAGAGATCGTCCAGTC         | <i>Gapdh</i> | S ATGACTCCACTCACGGCAAATT<br>AS TCCCATTCTCGGCCTTGAC       |
